# Supplementary material for: Non-aggregated Zn(ii)octa(2,6-diphenylphenoxy) phthalocyanine as a hole transporting material for efficient perovskite solar cells
Source: Royal Society of Chemistry journal article supplement (doi:10.1039/c5dt00396b), 2015-01-01
Supplement: c5dt00396b1.pdf [file c5dt00396b1.pdf]

## SUPPORTING INFORMATION

### **Non-aggregated Zn(II)octa(2,6-diphenylphenoxy) phthalocyanine as a Hole Transporting Material for efficient Perovskite Solar cells**

F. Javier Ramos,<sup>a,c</sup> M. Ince,<sup>a,d</sup> M. Urbani,<sup>b,e</sup> Antonio Abate,<sup>a</sup> M. Grätzel,<sup>a</sup> Shahzada Ahmad,<sup>c</sup> T. Torres<sup>\*b,e</sup> and Mohammad Khaja Nazeeruddin<sup>\*a,f</sup>

<sup>a</sup>Laboratory of Photonics and Interfaces, Institute of Chemical Sciences and Engineering, Swiss Federal Institute of Technology (EPFL), Station 6, CH 1015 – Lausanne, Switzerland. E-mail: [mdkhaja.nazeeruddin@epfl.ch](mailto:mdkhaja.nazeeruddin@epfl.ch)

<sup>b</sup>Universidad Autónoma de Madrid, Departamento de Química Orgánica, Cantoblanco, 28049 Madrid, Spain. E-mail: [tomas.torres@uam.es](mailto:tomas.torres@uam.es)

<sup>c</sup>Abengoa Research, C/Energía Solar no 1, Campus Palmas Altas-41014, Sevilla, Spain.

<sup>d</sup>Mersin University, Department of Energy Systems Engineering, Faculty of Tarsus Technology, 33480, Mersin, Turkey.

<sup>e</sup>Instituto Madrileño de Estudios Avanzados (IMDEA)-Nanociencia, c/ Faraday, 9, Cantoblanco, 28049 Madrid, Spain.

<sup>f</sup>Center of Excellence for Advanced Materials Research (CEAMR), King Abdulaziz University, Jeddah, Saudi Arabia

**Table S1.** Photovoltaic parameters, standard deviation, and average values, obtained for the perovskite solar cells employing phthalocyanine **TT80** as hole-transporting material.  $P_{in}$ , incident intensity of simulated AM1.5G solar light.<sup>a</sup>

| Cell               | Solvent           | Additives <sup>b</sup> | $J_{sc}$<br>[mA·cm <sup>-2</sup> ] | $V_{oc}$<br>[mV] | Fill Factor | $P_{in}$<br>[mW·cm <sup>-2</sup> ] | PCE<br>[%]     |
|--------------------|-------------------|------------------------|------------------------------------|------------------|-------------|------------------------------------|----------------|
| 1                  | PhCl              | NO                     | 11.903                             | 578.352          | 0.362       | 96.98                              | 2.5697         |
| 2                  |                   |                        | 11.890                             | 550.080          | 0.349       | 96.29                              | 2.3706         |
| Average            |                   |                        | 11.897                             | 564.22           | 0.3555      | –                                  | 2.470          |
| Standard deviation |                   |                        | 0.006                              | 14.14            | 0.0065      | –                                  | 0.100          |
| Relative error     |                   |                        | –                                  | –                | –           | –                                  | 4.0%           |
| Average rounded    |                   |                        | 11.897±0.006                       | 564±14           | 0.356±0.007 | –                                  | <b>2.5±0.1</b> |
| 1                  | PhCl              | YES                    | 16.354                             | 797.414          | 0.503       | 97.37                              | 6.7368         |
| 2                  |                   |                        | 16.694                             | 821.913          | 0.484       | 99.05                              | 6.7047         |
| 3                  |                   |                        | 15.693                             | 814.042          | 0.505       | 98.19                              | 6.5702         |
| 4                  |                   |                        | 17.056                             | 786.684          | 0.478       | 98.20                              | 6.5312         |
| Average            |                   |                        | 16.449                             | 805.01           | 0.4925      | –                                  | 6.630          |
| Standard deviation |                   |                        | 0.502                              | 13.79            | 0.0117      | –                                  | 0.091          |
| Relative error     |                   |                        | –                                  | –                | –           | –                                  | 1.4%           |
| Average Rounded    |                   |                        | 16.4±0.5                           | 805±14           | 0.493±0.01  | –                                  | <b>6.6±0.1</b> |
| 1                  | PhCH <sub>3</sub> | YES                    | 16.914                             | 795.603          | 0.450       | 0.974                              | 6.2147         |
| 2                  |                   |                        | 16.190                             | 797.372          | 0.464       | 0.977                              | 6.1329         |
| 3                  |                   |                        | 17.401                             | 803.157          | 0.408       | 0.972                              | 5.8694         |
| 4                  |                   |                        | 16.333                             | 812.572          | 0.408       | 0.980                              | 5.5271         |
| Average            |                   |                        | 16.710                             | 802.18           | 0.4325      | –                                  | 5.870          |
| Standard deviation |                   |                        | 0.483                              | 6.62             | 0.0250      | –                                  | 0.364          |
| Relative error     |                   |                        | –                                  | –                | –           | –                                  | 6.2%           |
| Average Rounded    |                   |                        | 16.7±0.5                           | 802±7            | 0.433±0.03  | –                                  | <b>5.9±0.4</b> |

<sup>a</sup>For 1 sun irradiation,  $P_{in} = 100 \text{ mW}\cdot\text{cm}^{-2}$ . <sup>b</sup>Additives: LiTFSI +TBP.

**Table S2.** Effect of the spin-coating speed on the photovoltaic parameters obtained for the perovskite solar cells devices employing phthalocyanine **TT80** as hole-transporting material.

| Additives   | Solvent           | Spin-coating speed (rpm) | $P_{in}$ [ $mW \cdot cm^{-2}$ ] | $J_{sc}$ ( $mA \cdot cm^{-2}$ ) | $V_{oc}$ (mV) | F.F. (%) | $\eta$ (%) |
|-------------|-------------------|--------------------------|---------------------------------|---------------------------------|---------------|----------|------------|
| LiTFSI +TBP | PhCl              | 2000                     | 97.4                            | 16.35                           | 797           | 50.3     | 6.7        |
|             |                   | 500                      | 98.2                            | 11.82                           | 378           | 25.1     | 2.35       |
| LiTFSI +TBP | PhCH <sub>3</sub> | 2000                     | 97.4                            | 16.91                           | 796           | 45.0     | 6.2        |
|             |                   | 500                      | 96.9                            | 16.49                           | 815           | 35.2     | 4.88       |

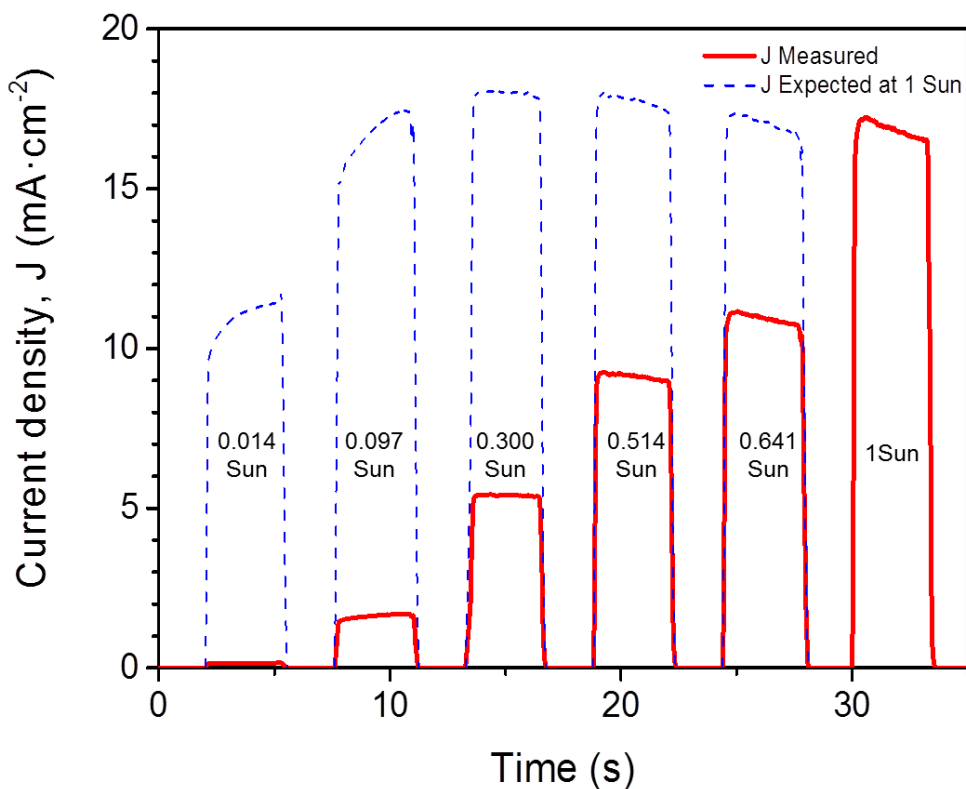

**Figure S1.** Current dynamics spectrum for the best PSC/TT80 cell (TT80+LiTFSI+TBP in PhCl).<sup>S1, S2</sup> Shutter was closed for 2s and then automatically opened during 3.5s with different sun filters to tune the incidence sun intensity. The expected photocurrent at 1Sun was calculated multiplying the measured photocurrent at each sun by the factor 1/incidence sun. Except in the case of 0.014 Sun, where the very small incidence light in comparison with 1 Sun can conduct bigger errors, a linear behavior was observed, thus the total  $J_{SC}$  at 1 sun can be calculated at any diffuse light only multiplying by the conversion factor ( $I_{1Sun}/I_{incidence}$ ). At medium sun intensities (0.3 and 0.514 Sun), the response of the transient photocurrent was while at high sun intensities a very small discharge in current was observed. The latter phenomena can be attributed to small saturation where some of the created charges were not collected properly until the stationary state is reached. If this behavior is not taken in consideration, higher currents can be recorded in the  $J$ - $V$  curve providing slightly higher values in power conversion efficiency. For this reason, we illuminated the perovskite solar cell during 5s before recording the  $J$ - $V$  curve and we have controlled the sweeping rate during the experiment (around 0.1V/s).

S1 Q. Jiang, X. Sheng, Y. Li, X. Feng and T. Xu, *Chem. Commun.*, 2014, **50**, 14720-14723.

S2 B. C. O'Regan, K. Bakker, J. Kroeze, H. Smit, P. Sommeling and J. R. Durrant, *J. Phys. Chem. B*, 2006, **110**, 17155-17160.

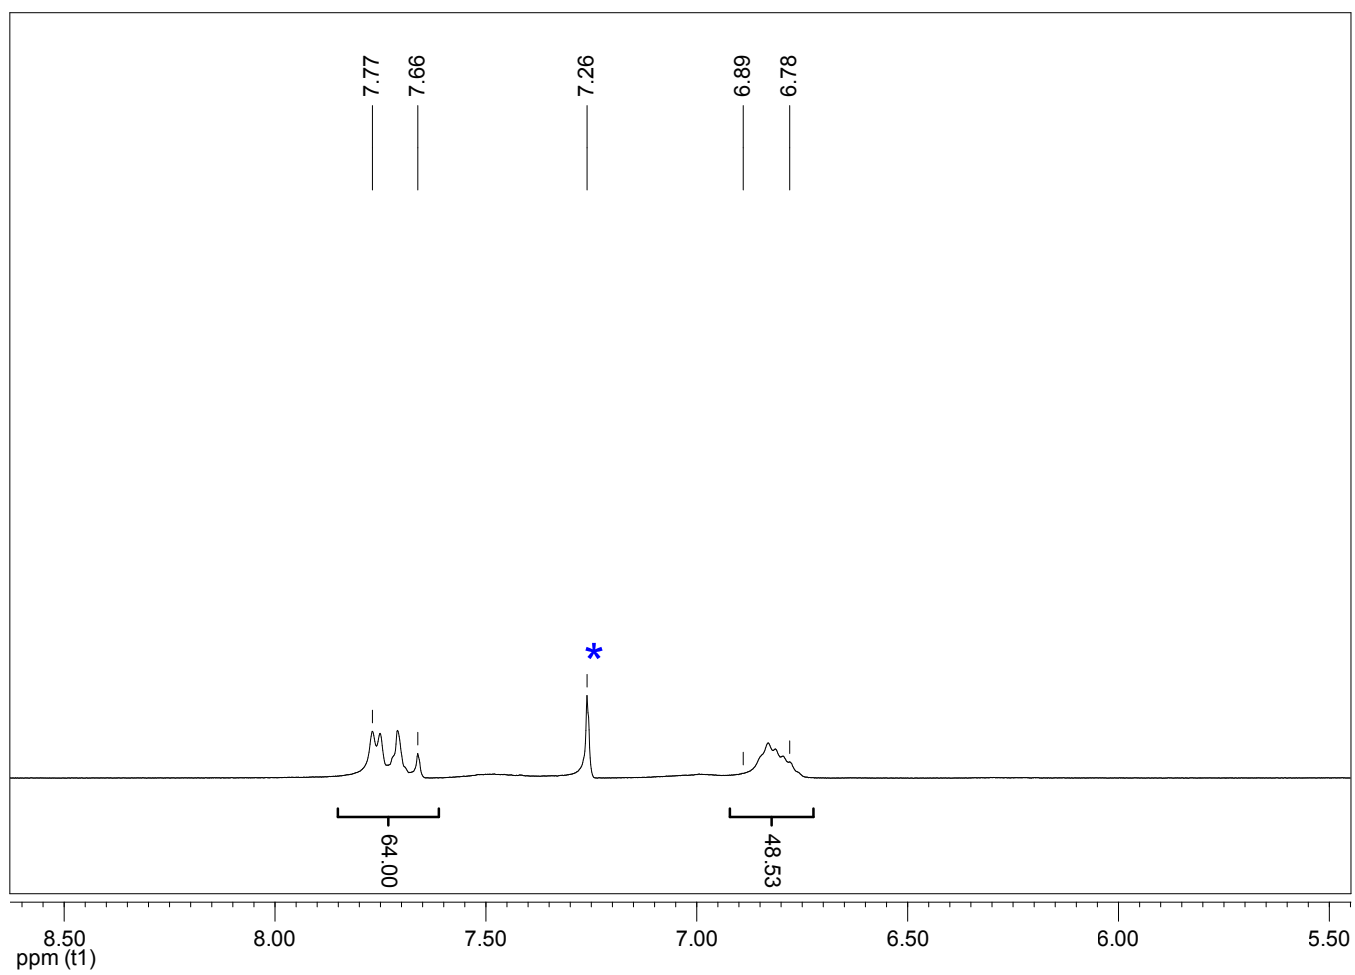

**Figure S2.** <sup>1</sup>H NMR spectrum (CDCl<sub>3</sub>; 400 MHz) of **TT80** (\* denotes the residual solvent peak of the CDCl<sub>3</sub> solvent).

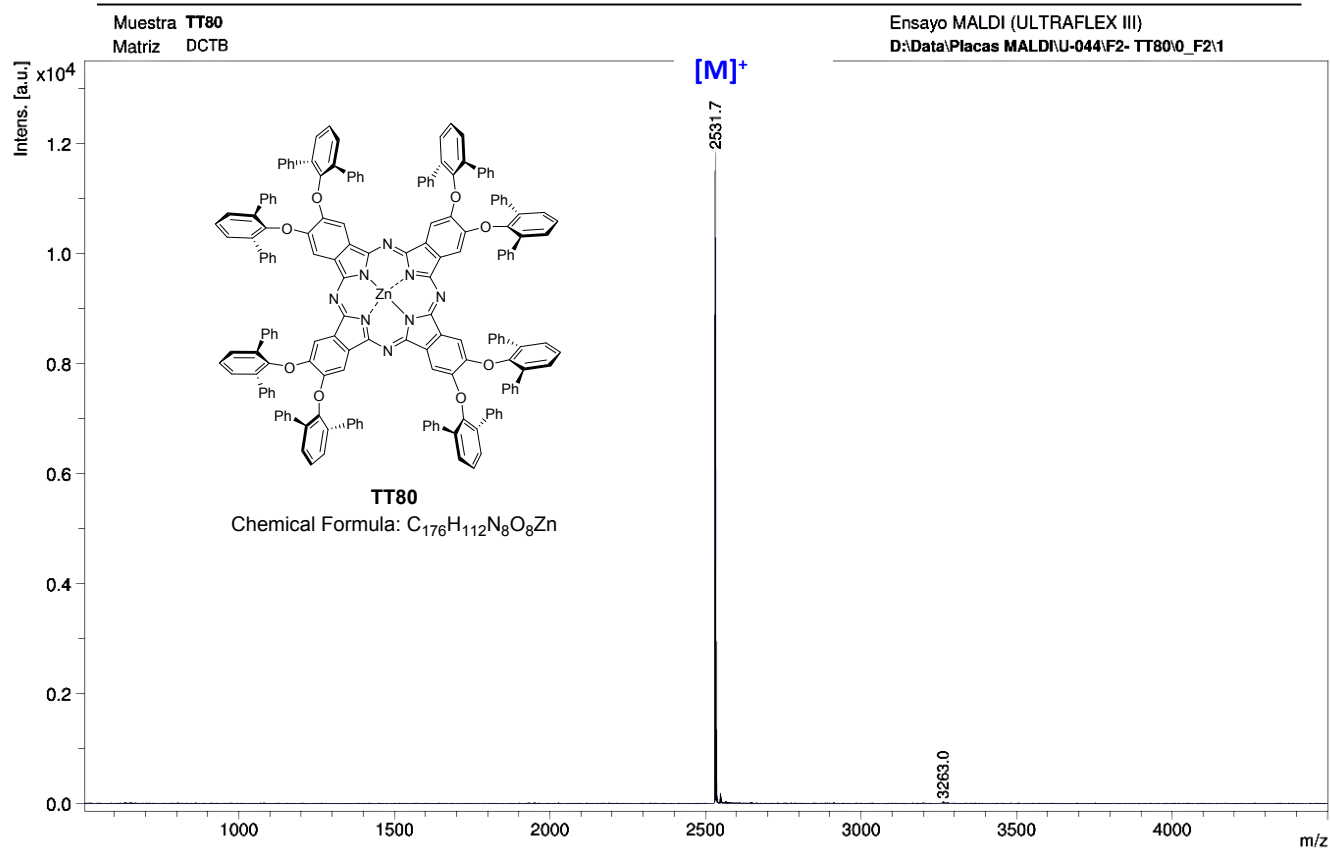

**Figure S3.** MALDI-TOF mass spectrum of **TT80** (matrix: DCTB); the most abundant peak is denoted.

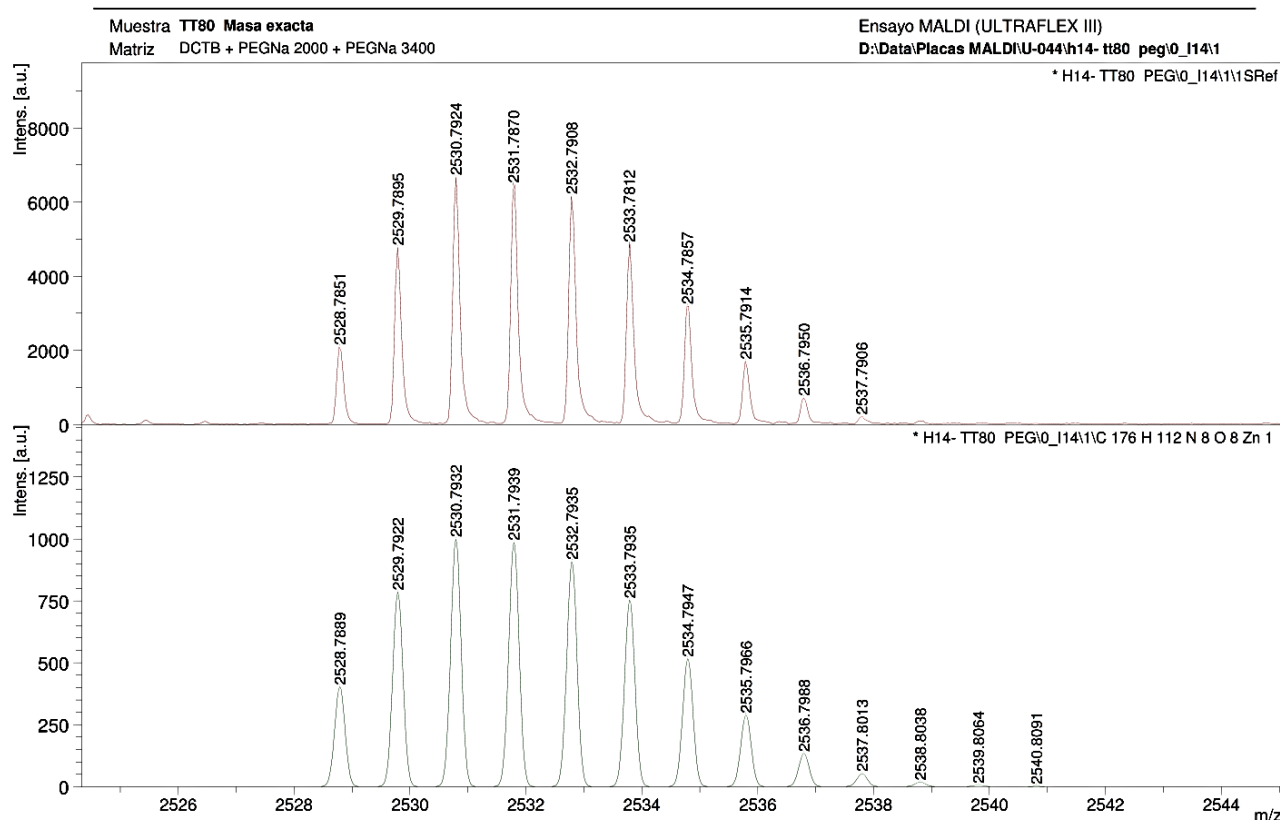

**Figure S4:** HRMS (MALDI-TOF) spectrum of **TT80** (matrix: DCTB + PEGNa 2000+PEGNa 3400). Top inset: experimental; bottom inset: theoretical isotopic distribution simulated for  $[M]^+$  ( $C_{176}H_{112}N_8O_8Zn_1$ ).

## Generated Molecular Formulas

| Formula                    | Mass       | Error  | DbIEq  | N rule | Electron Configuration |
|----------------------------|------------|--------|--------|--------|------------------------|
| C 171 H 112 N 10 O 10 Zn 1 | 2,528.7849 | 0.0839 | 121.00 | ok     | odd                    |
| C 176 H 112 N 8 O 8 Zn 1   | 2,528.7889 | 1.5069 | 125.00 | ok     | odd                    |
| C 180 H 110 N 7 O 6 Zn 1   | 2,528.7804 | 1.8755 | 129.50 | ok     | even                   |
| C 177 H 112 N 6 O 9 Zn 1   | 2,528.7777 | 2.9353 | 125.00 | ok     | odd                    |
| C 181 H 112 N 6 O 6 Zn 1   | 2,528.7929 | 3.0977 | 129.00 | ok     | odd                    |
| C 175 H 110 N 9 O 8 Zn 1   | 2,528.7763 | 3.4663 | 125.50 | ok     | even                   |
| C 172 H 114 N 9 O 10 Zn 1  | 2,528.7975 | 4.8893 | 120.50 | ok     | even                   |
| C 175 H 112 N 10 O 7 Zn 1  | 2,528.8001 | 5.9491 | 125.00 | ok     | odd                    |
| C 177 H 114 N 7 O 8 Zn 1   | 2,528.8015 | 6.4801 | 124.50 | ok     | even                   |
| C 179 H 108 N 8 O 6 Zn 1   | 2,528.7678 | 6.8486 | 130.00 | ok     | odd                    |
| C 176 H 110 N 7 O 9 Zn 1   | 2,528.7651 | 7.9085 | 125.50 | ok     | even                   |
| C 174 H 108 N 10 O 8 Zn 1  | 2,528.7638 | 8.4394 | 126.00 | ok     | odd                    |
| C 173 H 116 N 8 O 10 Zn 1  | 2,528.8100 | 9.8624 | 120.00 | ok     | odd                    |

**Figure S5:** Single mass analysis of **TT80** (Mass expressed in Da; Error expressed in mDa).
